# Supplementary material for: Prioritizing Solutions and Improving Resources among Young Pediatric Brain Tumor Survivors: Results of an Online Survey
Source: MDPI journal article supplement (doi:10.3390/curroncol30090623), 2023-09-19
Supplement: s1 [file s1]

Table S3: Bonferroni post hoc test

| P-values following repeated measure ANOVA comparing means of endorsing 14 solutions on a 0 (not at all helpful) to 3 (very helpful) scale (n = 63) |       |       |       |       |         |       |       |       |       |       |       |       |       |    |
|----------------------------------------------------------------------------------------------------------------------------------------------------|-------|-------|-------|-------|---------|-------|-------|-------|-------|-------|-------|-------|-------|----|
| Solutions                                                                                                                                          | 1     | 2     | 3     | 4     | 5       | 6     | 7     | 8     | 9     | 10    | 11    | 12    | 13    | 14 |
| 1                                                                                                                                                  |       |       |       |       |         |       |       |       |       |       |       |       |       |    |
| 2                                                                                                                                                  | 1.000 |       |       |       |         |       |       |       |       |       |       |       |       |    |
| 3                                                                                                                                                  | 1.000 | 1.000 |       |       |         |       |       |       |       |       |       |       |       |    |
| 4                                                                                                                                                  | 0.887 | 0.524 | 1.000 |       |         |       |       |       |       |       |       |       |       |    |
| 5                                                                                                                                                  | 1.000 | 1.000 | 1.000 | 0.056 |         |       |       |       |       |       |       |       |       |    |
| 6                                                                                                                                                  | 1.000 | 1.000 | 1.000 | 1.000 | 0.983   |       |       |       |       |       |       |       |       |    |
| 7                                                                                                                                                  | 0.002 | 0.003 | 0.006 | 1.000 | < 0.001 | 0.162 |       |       |       |       |       |       |       |    |
| 8                                                                                                                                                  | 0.722 | 1.000 | 1.000 | 1.000 | 0.307   | 1.000 | 0.884 |       |       |       |       |       |       |    |
| 9                                                                                                                                                  | 1.000 | 1.000 | 1.000 | 1.000 | 1.000   | 1.000 | 0.063 | 1.000 |       |       |       |       |       |    |
| 10                                                                                                                                                 | 0.074 | 0.110 | 0.145 | 1.000 | 0.007   | 1.000 | 1.000 | 1.000 | 1.000 |       |       |       |       |    |
| 11                                                                                                                                                 | 0.761 | 0.856 | 1.000 | 1.000 | 0.209   | 1.000 | 1.000 | 1.000 | 1.000 | 1.000 |       |       |       |    |
| 12                                                                                                                                                 | 1.000 | 1.000 | 1.000 | 1.000 | 1.000   | 1.000 | 0.019 | 1.000 | 1.000 | 0.900 | 1.000 |       |       |    |
| 13                                                                                                                                                 | 1.000 | 1.000 | 1.000 | 0.099 | 1.000   | 1.000 | 0.008 | 1.000 | 1.000 | 0.070 | 0.587 | 1.000 |       |    |
| 14                                                                                                                                                 | 1.000 | 1.000 | 1.000 | 1.000 | 1.000   | 1.000 | 0.477 | 1.000 | 1.000 | 1.000 | 1.000 | 1.000 | 1.000 |    |

Note.: ANOVA with a Greenhouse-Geisser correction ( $F(8.401) = 5.459$ ,  $p < 0.001$ ); Post-hoc statistically significant differences (#7<#1; #7<#2; #7<#3; #7<#5; #7<12; #7<#13, and #10<#5)
