# Supplementary material for: Prioritizing Solutions and Improving Resources among Young Pediatric Brain Tumor Survivors: Results of an Online Survey
Source: MDPI journal article supplement (doi:10.3390/curroncol30090623), 2023-09-19
Supplement: s1 [file s1]

Table S2: Experiences and difficulties of survivors in aftercare in health, school and work's domain.

| Domains | Topics                                                  | Selection                   | Young survivors<br>N (%) | Parents<br>N (%) | Total<br>N (%) |
|---------|---------------------------------------------------------|-----------------------------|--------------------------|------------------|----------------|
| Health  | Perceived health status compared with peers             | Much worse                  | 11 (25.6)                | 9 (37.5)         | 20 (29.9)      |
|         |                                                         | Worse                       | 19 (44.2)                | 9 (37.5)         | 28 (41.8)      |
|         |                                                         | About the same              | 12 (27.9)                | 6 (25)           | 18 (26.9)      |
|         |                                                         | Better                      | 1 (25.6)                 | -                | 1 (1.5)        |
|         | Difficulties cancer related                             | No                          | 8 (19)                   | 2 (8)            | 10 (14.9)      |
|         |                                                         | Yes                         | 34 (81)                  | 23 (92)          | 57 (85.1)      |
| School  | Current Study attendance                                | No                          | 20 (47.6)                | 14 (58.3)        | 34 (51.5)      |
|         |                                                         | Yes                         | 22 (52.4)                | 10 (41.7)        | 32 (48.5)      |
|         | Past study level                                        | Elementary                  | 1 (4.5)                  | -                | 1 (3.1)        |
|         |                                                         | Hight school or DEP         | 6 (27.3)                 | 3 (30)           | 9 (28.1)       |
|         |                                                         | CEGEP*                      | 6 (27.3)                 | 4 (40)           | 10 (31.3)      |
|         |                                                         | University                  | 4 (18.2)                 | -                | 4 (12.5)       |
|         |                                                         | Other                       | 5 (22.7)                 | 3 (30)           | 8 (25)         |
|         | Current study level                                     | Elementary                  | -                        | -                | -              |
|         |                                                         | Hight school or DEP         | 5 (25)                   | 11 (78.6)        | 16 (47.1)      |
|         |                                                         | CEGEP*                      | 3 (15)                   | 1 (7.1)          | 14 (11.8)      |
|         |                                                         | University                  | 8 (40)                   | 2 (14.3)         | 10 (29.4)      |
|         |                                                         | Other                       | 4 (20)                   | -                | 4 (11.2)       |
|         | School break during treatments                          | No                          | 10 (23.3)                | 6 (25)           | 16 (23.9)      |
|         |                                                         | Yes, completely             | 22 (51.2)                | 7 (29.2)         | 29 (43.3)      |
|         |                                                         | Yes, with a teacher at home | 11 (25.6)                | 11 (45.8)        | 22 (32.8)      |
|         | School attendance (without break during treatments)     | Very Easy                   | -                        | -                | -              |
|         |                                                         | Easy                        | 2 (22.2)                 | 2 (33.3)         | 4 (26.7)       |
|         |                                                         | Slightly difficult          | 5 (55.6)                 | 1 (16.7)         | 6 (40)         |
|         |                                                         | Very difficult              | 2 (22.2)                 | 3 (50)           | 5 (33.3)       |
|         | Back to school (with teacher at home during treatments) | Very Easy                   | -                        | -                | -              |
|         |                                                         | Easy                        | -                        | -                | -              |
|         |                                                         | Slightly difficult          | 7 (63.6)                 | 6 (54.5)         | 13 (59.1)      |
|         |                                                         | Very difficult              | 4 (36.4)                 | 5 (45.4)         | 9 (40.9)       |
|         | Back to school (after full break during treatments)     | Very Easy                   | 1 (4.8)                  | -                | 1 (3.6)        |
|         |                                                         | Easy                        | 1 (4.8)                  | -                | 1 (3.6)        |
|         |                                                         | Slightly difficult          | 5 (23.8)                 | -                | 5 (17.8)       |
|         |                                                         | Very difficult              | 14 (66.7)                | 7 (100)          | 21 (75)        |
| Work    | Current work situation                                  | Never worked                | 5 (11.9)                 | 6 (25)           | 11(16.7)       |
|         |                                                         | Already worked              | 15 (35.7)                | 8 (33.3)         | 23 (34.8)      |
|         |                                                         | Presently working           | 22 (52.4)                | 10 (41.7)        | 32 (48.5)      |
|         | Years of work                                           | Less than one year          | 16 (45.7)                | 6 (33.3)         | 22 (41.5)      |
|         |                                                         | Between one and five years  | 15 (42.8)                | 11 (61.1)        | 26 (49)        |
|         |                                                         | More than five years        | 4 (11.5)                 | 1 (5.6)          | 5 (9.5)        |
|         | Work hours                                              | Less than 7 h/week          | 2 (5.6)                  | 6 (33.3)         | 8 (14.8)       |
|         |                                                         | 7 to 30h/week               | 23 (63.8)                | 8 (44.5)         | 31 (57.4)      |
|         |                                                         | Over 30h                    | 11 (30.6)                | 4 (22.2)         | 15 (27.8)      |
|         | Experience in finding a job                             | Very Easy                   | 5 (14.3)                 | 3 (17.6)         | 8 (16)         |
|         |                                                         | Easy                        | 9 (25.7)                 | 5 (29,4)         | 14 (27.5)      |
|         |                                                         | Slightly difficult          | 13 (37)                  | 2 (11.8)         | 15 (24.4)      |
|         |                                                         | Very difficult              | 8 (23)                   | 7 (41.2)         | 15 (32.1)      |
|         |                                                         | Very easy                   | 7 (19.4)                 | 2 (11.1)         | 9 (15.3)       |

|                               |                    |           |          |           |
|-------------------------------|--------------------|-----------|----------|-----------|
| Ability to carry<br>out tasks | Easy               | 11 (30.6) | 5 (27.8) | 16 (29.2) |
|                               | Slightly difficult | 13 (36)   | 7 (38.9) | 20 (37.4) |
|                               | Very difficult     | 5 (14)    | 4 (22.2) | 9 (18.1)  |

---

\*CÉGEP is a degree of general and professional study in Quebec education system following High school that precede and can prepare to the University
